# Supplementary material
Source: publisher site journal article supplement (https://www.dovepress.com/article/supplementary_file/604276/604276_Supplementary%20Materials.docx)
Supplement: Supplementary file 1 [file 604276_Supplementary%20Materials.docx]

**Table S1.** Distribution of viable, apoptotic, and necrotic cell populations determined by Annexin V/PI flow cytometry after 24 h treatment with PNEE

| **Cell line** | **Treatment** | **Viable**  **(PI−/AnV−) (%)** | **Early apoptosis (PI−/AnV+) (%)** | **Late apoptosis (PI+/AnV+) (%)** | **Necrosis (PI+/AnV−) (%)** |
| --- | --- | --- | --- | --- | --- |
| BT-474 | Control | 91.65 ± 0.50 | 3.78 ± 1.25 | 3.00 ± 1.43 | 1.29 ± 0.13 |
| PNEE | 28.25 ± 1.86* | 2.21 ± 0.26 | 63.77 ± 1.47* | 5.77 ± 0.88 |
| MCF-7 | Control | 91.43 ± 0.46 | 3.40 ± 0.13 | 4.95 ± 0.46 | 0.23 ± 0.05 |
| PNEE | 24.65 ± 1.75* | 56.50 ± 1.10* | 18.15 ± 0.71* | 0.70 ± 0.30 |

Cell populations were classified as viable (PI−/AnV−), early apoptotic (PI−/AnV+), late apoptotic (PI+/AnV+), and necrotic (PI+/AnV−) based on Annexin V/PI flow cytometry analysis. Data are presented as mean ± SD from three independent experiments. Statistical significance was determined by unpaired t-test comparing PNEE-treated cells with their respective controls as *p < 0.05 compared to the control.

**Table S2.** Distribution of PI/FSC cell populations following 24 h treatment with PNEE.

| **Cell line** | **Treatment** | **PI+/FSC− (%)** | **PI−/FSC− (%)** |
| --- | --- | --- | --- |
| BT-474 | Control | 3.54 ± 0.34 | 1.25 ± 0.10 |
| PNEE | 25.90 ± 0.08* | 3.35 ± 0.71 |
| MCF-7 | Control | 2.90 ± 0.22 | 3.75 ± 0.48 |
| PNEE | 7.07 ± 0.46* | 19.37 ± 0.90* |

Cell populations were classified according to plasma membrane permeability (PI) and relative cell size (FSC). PI+/FSC− cells represent membrane-compromised cells with reduced forward scatter, whereas PI−/FSC− cells represent shrunken cells without detectable membrane permeabilization. Data are presented as mean ± SD from three independent experiments. Statistical significance was determined by unpaired t-test comparing PNEE-treated cells with their respective controls as *p < 0.05 compared to the control.
